# Supplementary material for: Phase-encoded RF signal generation based on an integrated 49GHz micro-comb soliton crystal optical source
Source: Research Square preprint supplement (doi:10.21203/rs.3.rs-669487/v1), 2021-06-30
Supplement: Supplementary file 1 [file 14cf72911b9368b6cd99fd0c.docx]

(2.2)
